# Supplementary material for: Engineered extracellular vesicles with high collagen-binding affinity present superior in situ retention and therapeutic efficacy in tissue repair
Source: Theranostics. 2022 Aug 8;12(13):6021–37. doi: 10.7150/thno.70448 (PMC9373818; doi:10.7150/thno.70448)
Supplement: Supplementary file 1 — Supplementary figures and table. [file thnov12p6021s1.pdf]

## Supplementary materials

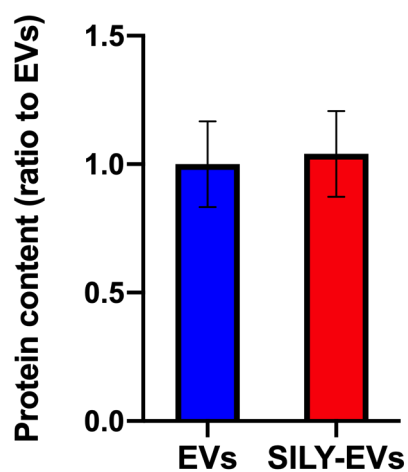

**Figure S1.** BCA assay of the same number of EVs and SILY-EVs. Data are expressed as mean  $\pm$  standard deviation (n = 6).

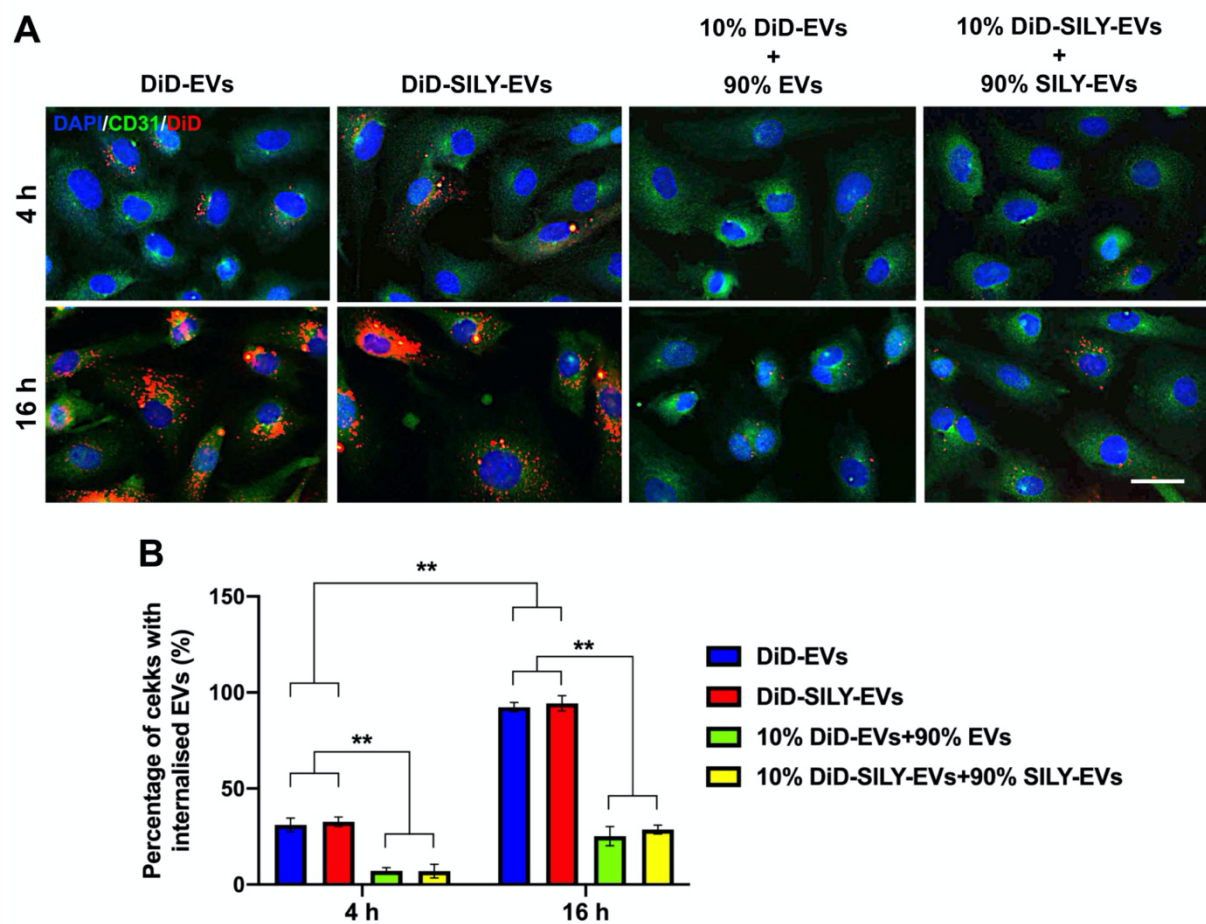

**Figure S2.** Cellular uptake efficiency of EVs and SILY-EVs. (A) Images of uptake of DiD-labeled EVs or SILY-EVs in HECFCs. Scale bar = 10  $\mu$ m. (B) Quantification of the uptake rate of EVs or SILY-EVs in HECFCs. Data are expressed as mean  $\pm$  standard deviation: \*\* $p < 0.01$  ( $n = 6$ ).

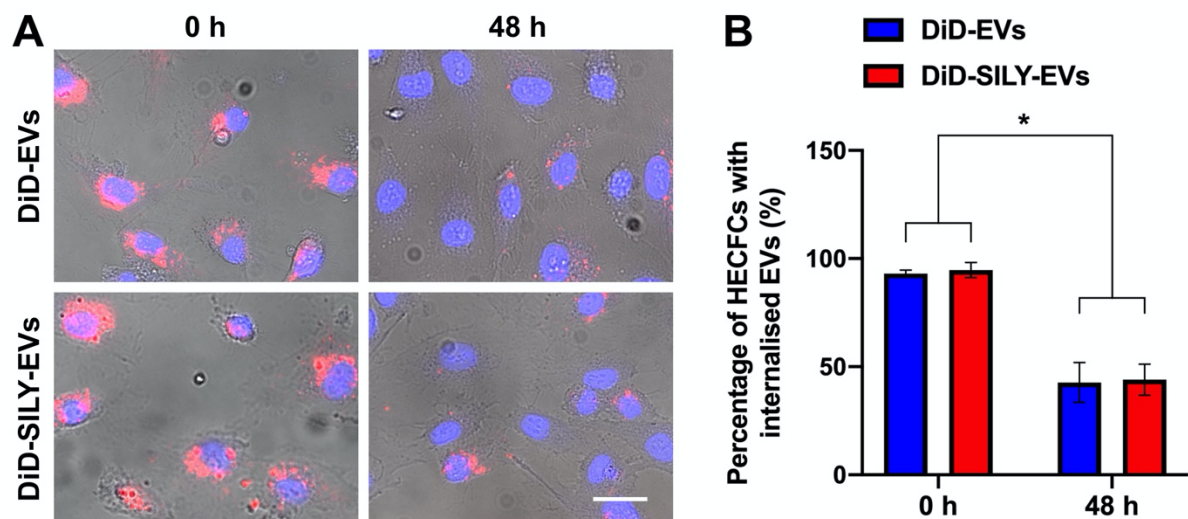

**Figure S3.** Kinetics of EVs and SILY-EVs internalized in HECFCs. (A) Images of DiD-labeled EVs or SILY-EVs internalized in HECFCs cultured in medium without DiD-labeled EVs or SILY-EVs for 0 h and 48 h. Scale bar = 10  $\mu$ m. (B) Quantification of the percentage of HECFCs with internalized DiD-labeled EVs or SILY-EVs. Data are expressed as mean  $\pm$  standard deviation: \* $p < 0.05$  ( $n = 6$ ).

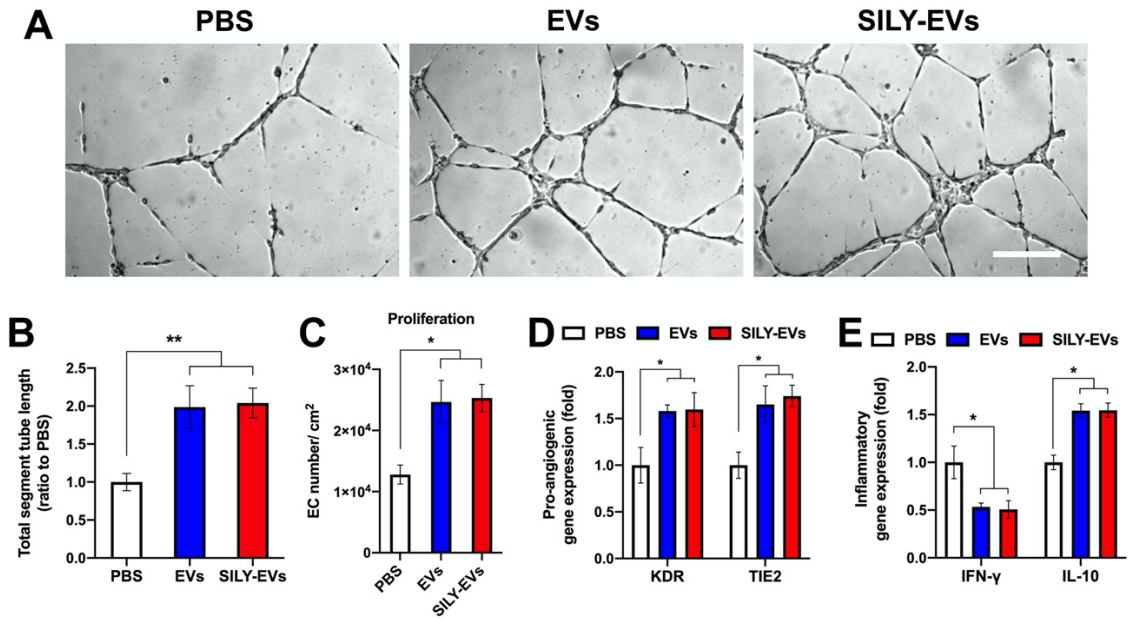

**Figure S4.** Biological functions of EVs and SILY-EVs. (A) Effect of EVs or SILY-EVs on tube formation. Scale bar = 10  $\mu$ m. (B) Quantification of total segment tube length. (C) Effect of EVs or SILY-EVs on HECFC proliferation. (D) Effect of EVs or SILY-EVs on pro-angiogenic gene expression. (E) Effect of EVs or SILY-EVs on inflammatory gene expression. Data are expressed as mean  $\pm$  standard deviation: \* $p < 0.05$ , \*\* $p < 0.01$  ( $n = 6$ ).

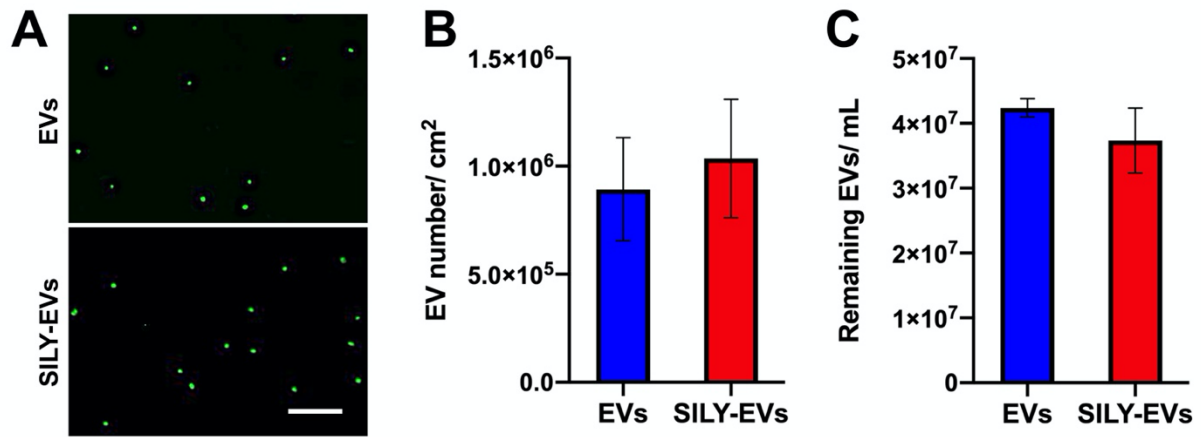

**Figure S5.** Attachment of EVs and SILY-EVs on type III collagen surface. (A) Images of attached PKH67-labeled EVs or SILY-EVs on type III collagen surface. Scale bar = 3  $\mu$ m. (B) Quantification of the numbers of EVs or SILY-EVs attached to the type III collagen surface. (C) Quantification of the numbers of the EVs or SILY-EVs unattached to the type III collagen surface by using NTA. Data are expressed as mean  $\pm$  standard deviation (n = 6).

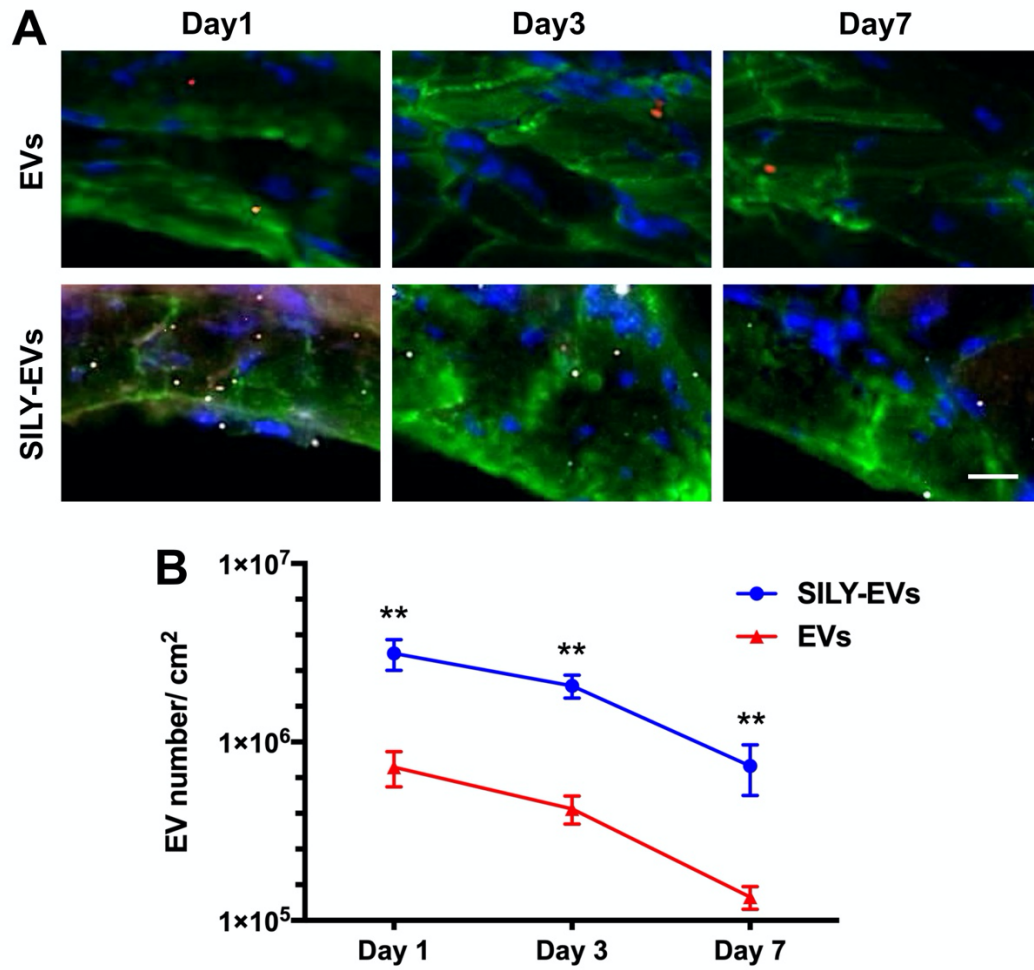

**Figure S6.** *Ex vivo* evaluation for retention of EVs and SILY-EVs on the ischemic hind limb tissue section. (A) Retention of EVs and SILY-EVs on the ischemic hind limb tissue section via binding to collagen at day 1, 3 and 7. Green indicated collagen, blue indicated nucleus, red indicated DiD-labeled EVs, and gray indicated TAMRA-labeled SILY. The white arrows indicated EVs or SILY-EVs attached on the collagen of the ischemic hind limb tissue section. Scale bar = 10  $\mu$ m. (B) Quantification of the EVs and SILY-EVs attached on the collagen of the ischemic hind limb tissue section. Data are expressed as mean  $\pm$  standard deviation: \*\* $p < 0.01$  ( $n = 6$ ).

| <b>Gene</b>    | <b>Forward sequence</b> | <b>Reverse sequence</b>  |
|----------------|-------------------------|--------------------------|
| hKDR           | GGAACCTCACTATCCGCAGAGT  | CCAAGTTCGTCTTTTCCTGGGC   |
| hTIE2          | GGTCAAGCAACCCAGCCTTTTC  | CAGGTCATTCCAGCAGAGCCAA   |
| hIFN- $\gamma$ | GAGTGTGGAGACCATCAAGGAAG | TGCTTTGCGTTGGACATTCAAGTC |
| hIL10          | TCTCCGAGATGCCTTCAGCAGA  | TCAGACAAGGCTTGGCAACCCA   |
| hGAPDH         | GTCTCCTCTGACTTCAACAGCG  | ACCACCCTGTTGCTGTAGCCAA   |
| mIFN- $\gamma$ | CAGCAACAGCAAGGCGAAAAAGG | TTCCGCTTCCTGAGGCTGGAT    |
| mIL10          | CGGGAAGACAATAACTGCACCC  | CGGTTAGCAGTATGTTGTCCAGC  |
| mMyoz1         | GGAACCTGGCATTGACCTACTG  | AAACTTGGGCATCTGGAAGG     |
| mMyoz3         | TGGCAGCAGAAGTCACACTC    | AGTTCCAAGCCACTGAAGGAC    |
| mAngII         | AACTCGCTCCTTCAGAAGCAGC  | TTCCGCACAGTCTCTGAAGGTG   |
| mPECAM1        | CCAAAGCCAGTAGCATCATGGTC | GGATGGTGAAGTTGGCTACAGG   |
| mGAPDH         | CATCACTGCCACCCAGAAGACTG | ATGCCAGTGAGCTTCCCGTTCAG  |

**Table S1.** Primers used for RT-qPCR.
